# Supplementary material
Source: PubMed Central journal article supplement (PMC5270564)

*Rhodopirellula baltica*

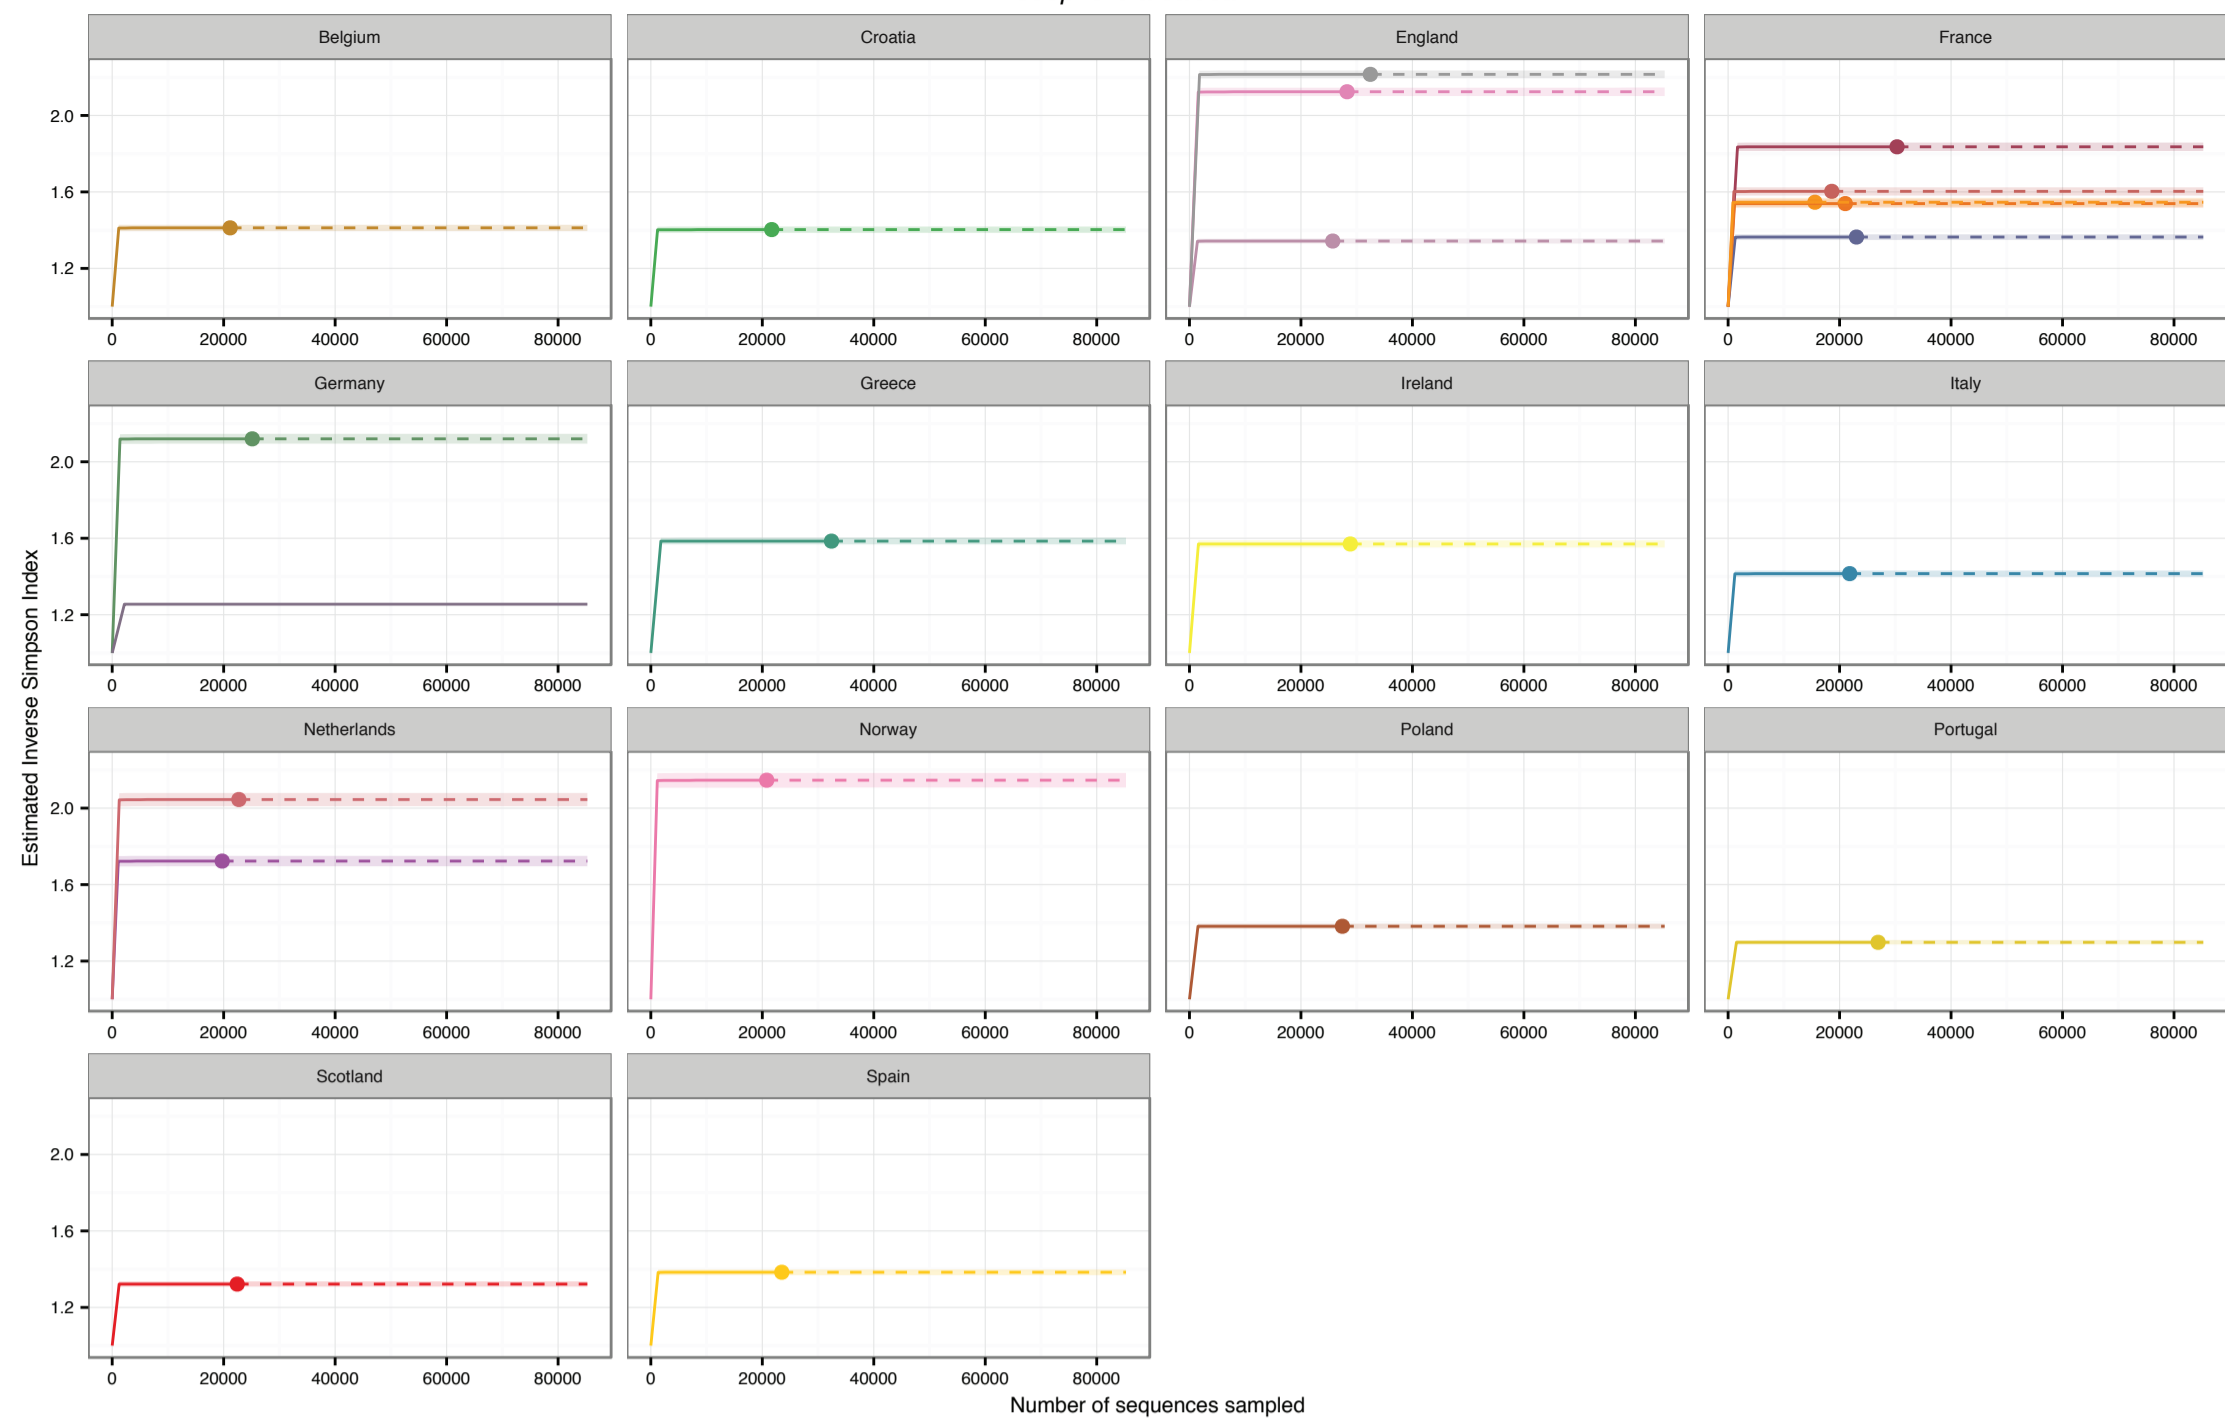

*'Rhodopirellula islandica'*

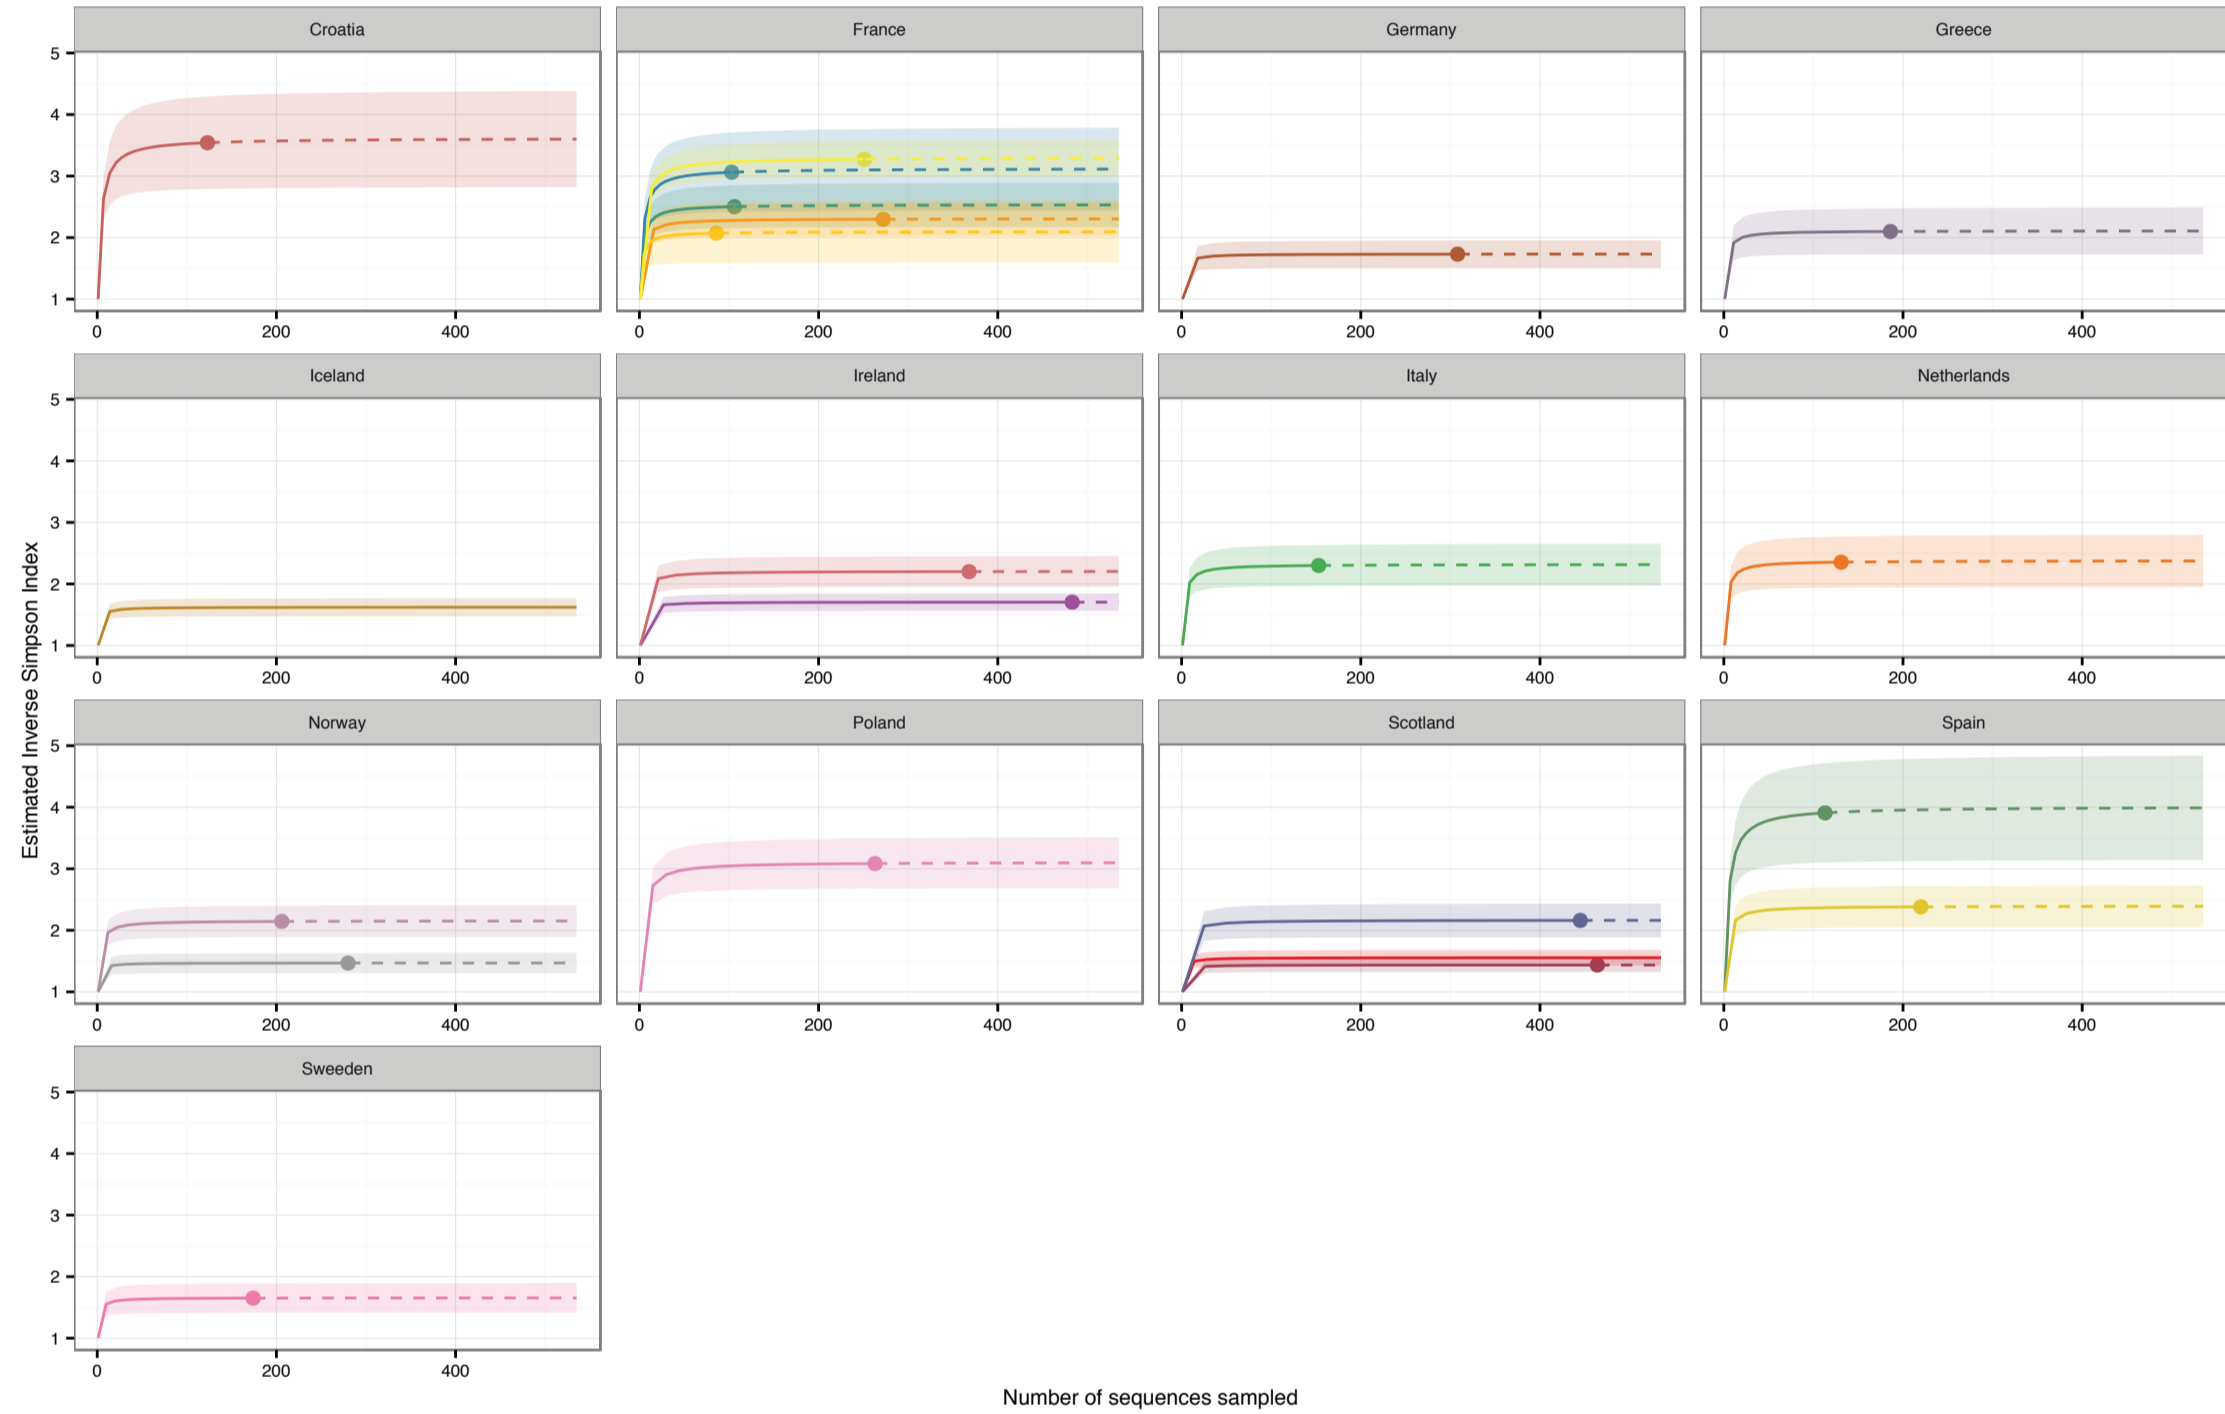

*'Rhodopirellula europaea'*

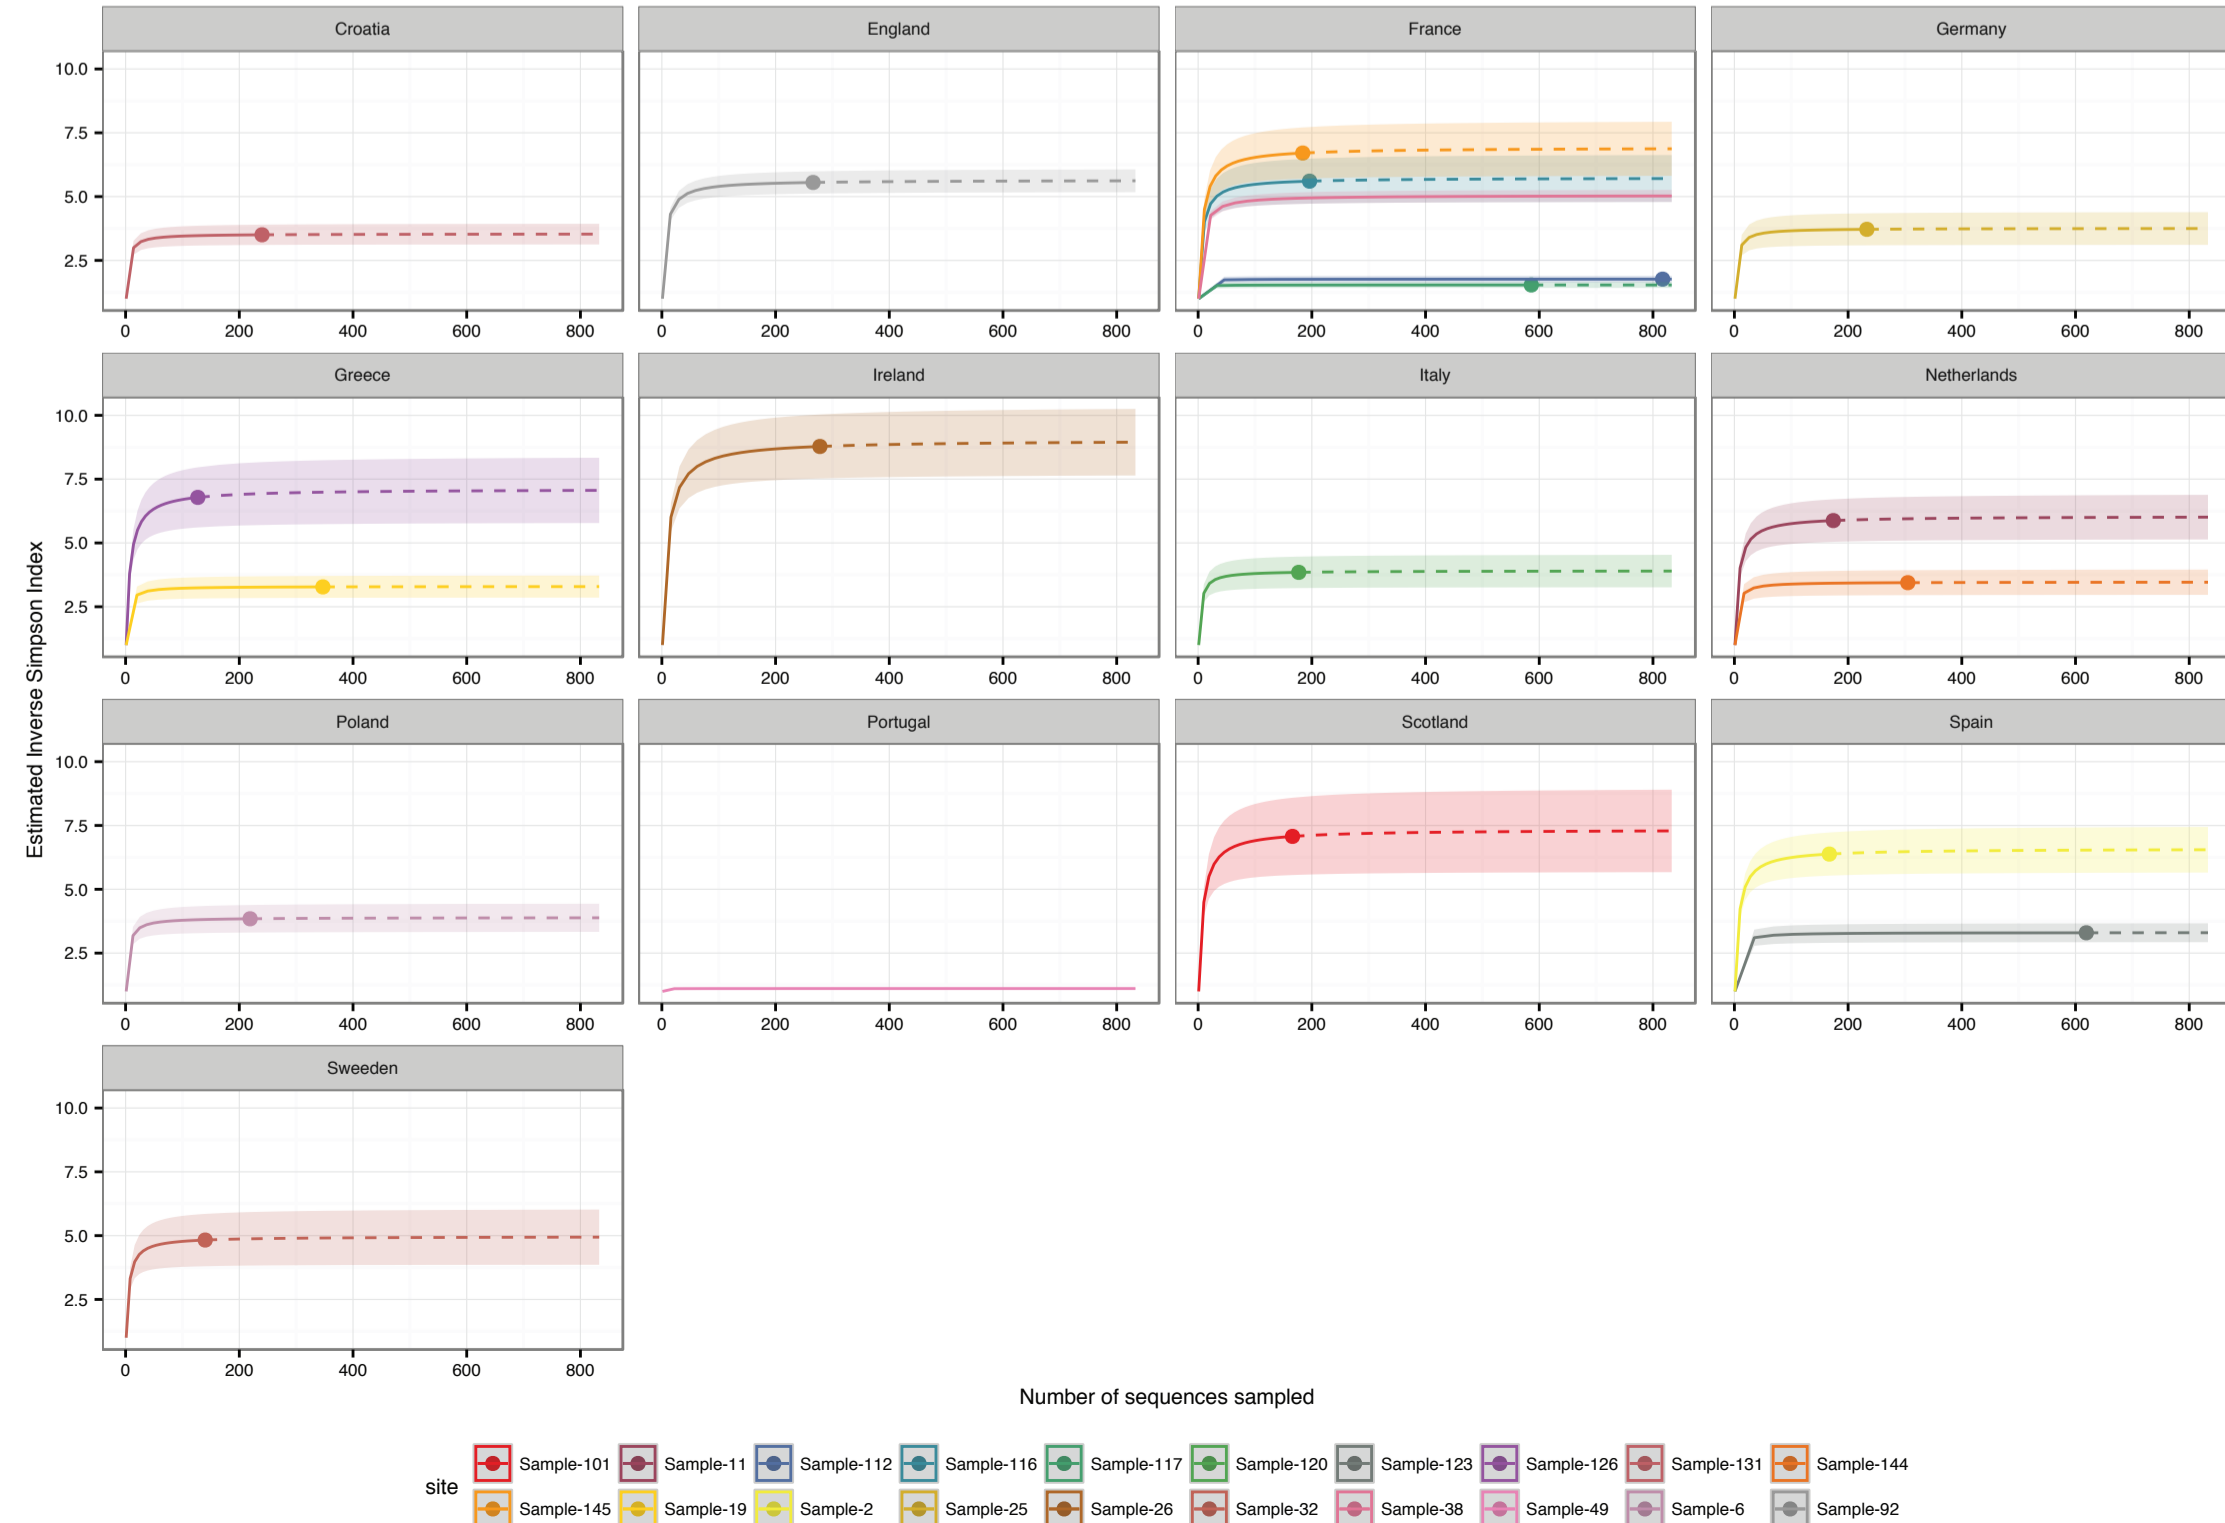

Supplement: ismej2016123x2.pdf [file ismej2016123x2.pdf]
